# Supplementary material for: Adherence to the 2012 American College of Rheumatology (ACR) Guidelines for Management of Gout: A Survey of Brazilian Rheumatologists
Source: PubMed Central journal article supplement (PMC4537114; doi:10.1371/journal.pone.0135805), 2015-08-14
Supplement: pone.0135805.s001.pdf [file pone.0135805.s001.pdf]

# Survey of Gout Treatment in Brazil

THE GOUT COMMITTEE OF THE BRAZILIAN SOCIETY OF RHEUMATOLOGY NEEDS YOUR ASSISTANCE!

Dear colleagues,

We are conducting a survey on gout treatment practices by Brazilian Rheumatologists.

Responses should reflect clinical practice, with no concern for right or wrong.

The data will be evaluated without any identification of responders.

It will take less than 10 minutes!

Join!

Thank you!

Gout Committee

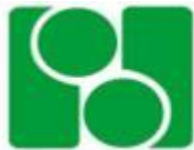

**Sociedade Brasileira de Reumatologia**  
**Comissão de Gota**

# Survey of Gout Treatment in Brazil

## About the pharmacological approach of acute gouty attack

### 1. What is your first choice for an acute gouty attack in an OTHERWISE HEALTHY PATIENT?

|                                             | colchicine 0.5 mg/hour until symptom resolution or side effect | colchicine ≤ 2 mg/day | Nonsteroidal anti-inflammatory drug (NSAID) | PO steroid            | IM steroid            | Intra-articular steroid | NSAID + colchicine    | NSAID + steroid (PO/IM/IA) | Steroid (PO/IM/IA) + colchicine |
|---------------------------------------------|----------------------------------------------------------------|-----------------------|---------------------------------------------|-----------------------|-----------------------|-------------------------|-----------------------|----------------------------|---------------------------------|
| Monoarticular involvement, onset < 36 hours | <input type="radio"/>                                          | <input type="radio"/> | <input type="radio"/>                       | <input type="radio"/> | <input type="radio"/> | <input type="radio"/>   | <input type="radio"/> | <input type="radio"/>      | <input type="radio"/>           |
| Monoarticular involvement, onset > 36 hours | <input type="radio"/>                                          | <input type="radio"/> | <input type="radio"/>                       | <input type="radio"/> | <input type="radio"/> | <input type="radio"/>   | <input type="radio"/> | <input type="radio"/>      | <input type="radio"/>           |
| Polyarticular involvement, onset < 36 hours | <input type="radio"/>                                          | <input type="radio"/> | <input type="radio"/>                       | <input type="radio"/> | <input type="radio"/> | <input type="radio"/>   | <input type="radio"/> | <input type="radio"/>      | <input type="radio"/>           |
| Polyarticular involvement, onset > 36 hours | <input type="radio"/>                                          | <input type="radio"/> | <input type="radio"/>                       | <input type="radio"/> | <input type="radio"/> | <input type="radio"/>   | <input type="radio"/> | <input type="radio"/>      | <input type="radio"/>           |

### 2. What is your first choice for an acute gouty attack in a patient with CREATININE CLEARANCE (CrCl) ≤ 60 ML/MIN?

|                                             | colchicine 0.5 mg/hour until symptom resolution or side effect | colchicine ≤ 2 mg/day | Nonsteroidal anti-inflammatory drug (NSAID) | PO steroid            | IM steroid            | Intra-articular steroid | NSAID + colchicine    | NSAID + steroid (PO/IM/IA) | Steroid (PO/IM/IA) + colchicine |
|---------------------------------------------|----------------------------------------------------------------|-----------------------|---------------------------------------------|-----------------------|-----------------------|-------------------------|-----------------------|----------------------------|---------------------------------|
| Monoarticular involvement, onset < 36 hours | <input type="radio"/>                                          | <input type="radio"/> | <input type="radio"/>                       | <input type="radio"/> | <input type="radio"/> | <input type="radio"/>   | <input type="radio"/> | <input type="radio"/>      | <input type="radio"/>           |
| Monoarticular involvement, onset > 36 hours | <input type="radio"/>                                          | <input type="radio"/> | <input type="radio"/>                       | <input type="radio"/> | <input type="radio"/> | <input type="radio"/>   | <input type="radio"/> | <input type="radio"/>      | <input type="radio"/>           |
| Polyarticular involvement, onset < 36 hours | <input type="radio"/>                                          | <input type="radio"/> | <input type="radio"/>                       | <input type="radio"/> | <input type="radio"/> | <input type="radio"/>   | <input type="radio"/> | <input type="radio"/>      | <input type="radio"/>           |
| Polyarticular involvement, onset > 36 hours | <input type="radio"/>                                          | <input type="radio"/> | <input type="radio"/>                       | <input type="radio"/> | <input type="radio"/> | <input type="radio"/>   | <input type="radio"/> | <input type="radio"/>      | <input type="radio"/>           |

### 3. During an acute gouty attack in a patient using urate-lowering therapy (ULT) (eg. allopurinol), you:

- Increase the dose of the ULT
- Keep the dose of the ULT
- Reduce the dose of the ULT
- Withdraw the ULT

# Survey of Gout Treatment in Brazil

## About urate-lowering therapy (ULT)

### 4. When would you initiate ULT? Check all that apply.

- After their first gouty attack.
- After two or more gouty attacks a year.
- When a patient with gout has tophi.
- When a patient with gout has chronic kidney disease.
- None of the above.

### 5. Choose the serum uric acid (SUA) level you consider the goal for ULT for a patient WITH TOPHI:

- < upper limit of normal
- < 6.8 mg/dl
- < 6.0 mg/dl
- < 5.0 mg/dl
- I do not titrate ULT based on the SUA level

Questions 6 to 10 are only offered to those who did not answer "I do not titrate ULT based on the SUA level" in the question 5.

### 6. Choose the SUA level you consider the goal for ULT for a patient WITHOUT TOPHI:

- < upper limit of normal
- < 6.8 mg/dl
- < 6.0 mg/dl
- < 5.0 mg/dl
- I do not titrate ULT based on the SUA level

### 7. How often do your patients reach this target with current treatments?

- Always
- Almost always
- Sometimes
- Almost never
- Never

### 8. For how long after achieving the target SUA level do you prescribe ULT for a patient with gout WITHOUT tophi?

- Withdraw the medication
- Maintain for 1 - 6 months
- Maintain for 7 - 11 months
- Maintain for 1 - 3 years
- Maintain for 4 or more years
- Maintain indefinitely

# Survey of Gout Treatment in Brazil

## About urate-lowering therapy (ULT)

### 9. For how long after achieving the target SUA level do you prescribe ULT for a patient with gout WITH tophi?

- Withdraw the medication
- Maintain for 1 - 6 months
- Maintain for 7 - 11 months
- Maintain for 1 - 3 years
- Maintain for 4 or more years
- Maintain until tophi resolution
- Maintain indefinitely

### 10. How often do you check your patients SUA levels?

|                                        | 1-3 months            | 4-6 months            | 7-9 months            | 10-12 months          | I do not check it.    |
|----------------------------------------|-----------------------|-----------------------|-----------------------|-----------------------|-----------------------|
| Before achieving the target SUA level: | <input type="radio"/> | <input type="radio"/> | <input type="radio"/> | <input type="radio"/> | <input type="radio"/> |
| After achieving the target SUA level:  | <input type="radio"/> | <input type="radio"/> | <input type="radio"/> | <input type="radio"/> | <input type="radio"/> |

### 11. How many of your patients have ever presented an allergic reaction to allopurinol under your care?

|                 | 0                     | 1 - 5                 | 6 - 10                | 11 - 15               | > 15                  |
|-----------------|-----------------------|-----------------------|-----------------------|-----------------------|-----------------------|
| Mild reaction   | <input type="radio"/> | <input type="radio"/> | <input type="radio"/> | <input type="radio"/> | <input type="radio"/> |
| Severe reaction | <input type="radio"/> | <input type="radio"/> | <input type="radio"/> | <input type="radio"/> | <input type="radio"/> |

### 12. In general, when you initiate allopurinol, what is the initial dose you prescribe?

|                                          | 50 mg/day             | 100 mg/day            | 200 mg/day            | 300 mg/day            |
|------------------------------------------|-----------------------|-----------------------|-----------------------|-----------------------|
| For a patient with normal renal function | <input type="radio"/> | <input type="radio"/> | <input type="radio"/> | <input type="radio"/> |
| For a patient with CrCl $\leq$ 60 ml/min | <input type="radio"/> | <input type="radio"/> | <input type="radio"/> | <input type="radio"/> |

### 13. What is the maximum dose of allopurinol most frequently prescribed by you?

|                                          | $\leq$ 300 mg/day     | 350 - 450 mg/day      | 500 - 600 mg/day      | 650 - 750 mg/day      | 800 - 900 mg/day      |
|------------------------------------------|-----------------------|-----------------------|-----------------------|-----------------------|-----------------------|
| For a patient with normal renal function | <input type="radio"/> | <input type="radio"/> | <input type="radio"/> | <input type="radio"/> | <input type="radio"/> |
| For a patient with CrCl $\leq$ 60ml/min  | <input type="radio"/> | <input type="radio"/> | <input type="radio"/> | <input type="radio"/> | <input type="radio"/> |

# Survey of Gout Treatment in Brazil

## About urate-lowering therapy (ULT)

### 14. Do you prescribe BENZBROMARONE?

|                                                                                                        | always                | almost always         | sometimes             | almost never          | never                 |
|--------------------------------------------------------------------------------------------------------|-----------------------|-----------------------|-----------------------|-----------------------|-----------------------|
| For patients with CrCl > 60 ml/min                                                                     | <input type="radio"/> | <input type="radio"/> | <input type="radio"/> | <input type="radio"/> | <input type="radio"/> |
| For patients with CrCl between 30 and 60 ml/min                                                        | <input type="radio"/> | <input type="radio"/> | <input type="radio"/> | <input type="radio"/> | <input type="radio"/> |
| For patients with CrCl < 30 ml/min                                                                     | <input type="radio"/> | <input type="radio"/> | <input type="radio"/> | <input type="radio"/> | <input type="radio"/> |
| For patients with current renal underexcretion of uric acid and a history of kidney stones in the past | <input type="radio"/> | <input type="radio"/> | <input type="radio"/> | <input type="radio"/> | <input type="radio"/> |
| For patients also using ALLOPURINOL                                                                    | <input type="radio"/> | <input type="radio"/> | <input type="radio"/> | <input type="radio"/> | <input type="radio"/> |

### 15. If you were to initiate ULT in a patient, would you wait for the resolution of the acute gouty attack?

- Yes
- No

### 16. How long after resolution of the acute gouty attack would you wait to initiate ULT?

- 1 - 3 weeks
- 4 - 6 weeks
- 7 - 9 weeks
- 10 - 12 weeks

This question is offered only to those who answered "YES" to the question 15.

# Survey of Gout Treatment in Brazil

## About prophylaxis of acute gouty attacks

### 17. How often do you give prophylatic treatment to prevent acute gouty attacks when initiating ULT?

- Always                       Almost always                       Sometimes                       Almost never                       Never

The following questions in this page are not offered to those who answered "NEVER" to the question 17.

### 18. How long do you keep prophylaxis for patients WITHOUT tophi?

- < 1 month  
 1 - 6 months  
 7 - 12 months  
 Until they reach the target SUA level  
 Indefinitely

### 19. How long do you keep prophylaxis for patients WITH tophi?

- < 1 month  
 1 - 6 months  
 7 - 12 months  
 Until they reach the target SUA level  
 Until resolution of tophi  
 Indefinitely

### 20. Do you prefer colchicine or NSAID for chronic prophylaxis of acute gouty attacks?

- Colchicine  
 NSAID

# Survey of Gout Treatment in Brazil

## About you

### 21. Gender:

- Female  
 Male

### 22. About you

|          |                      |                                      |                              |
|----------|----------------------|--------------------------------------|------------------------------|
|          | Age                  | Time since Medical School graduation | Time practicing Rheumatology |
| In years | <input type="text"/> | <input type="text"/>                 | <input type="text"/>         |

### 23. State in which you practice:

|       |                      |
|-------|----------------------|
| State | <input type="text"/> |
|-------|----------------------|

### 24. On average, number of gout patients you see monthly:

|                          |                      |
|--------------------------|----------------------|
| Patients with gout/month | <input type="text"/> |
|--------------------------|----------------------|

### 25. Type of practice

- Private       Academic       Combined

### 26. Residency or specialization in Rheumatology?

- No       Residency       Specialization

### 27. Did you attend the Brazilian Society of Rheumatology Meeting in 2013 (2013 BSR Meeting)?

- Yes       No

## About you

### 28. Have you been to a gout lecture at 2013 BSR Meeting?

Yes

No

This question is offered only to those who answered "YES" to the question 27.

Thank you very much for your participation!

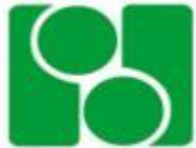

Sociedade Brasileira de Reumatologia  
Comissão de Gota
